# Supplementary material
Source: PubMed Central journal article supplement (PMC1088392)

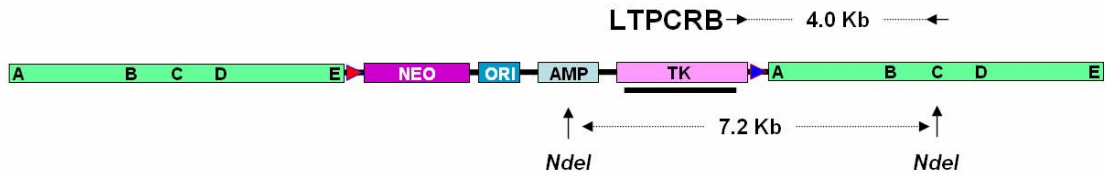

**R1-UP-neotk**

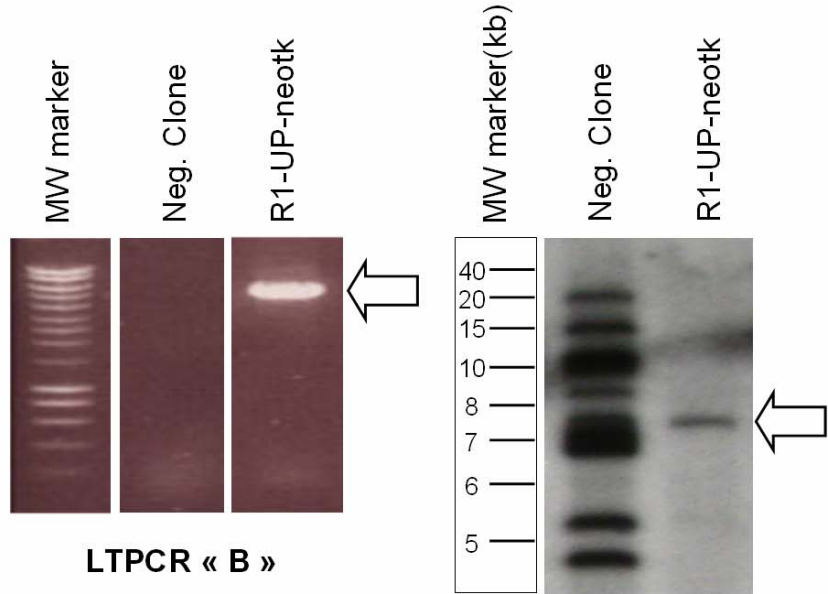

**Southern blot**

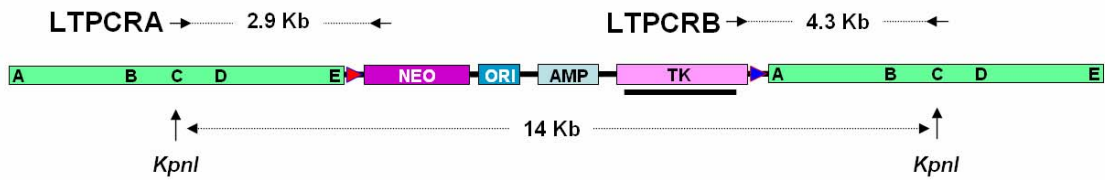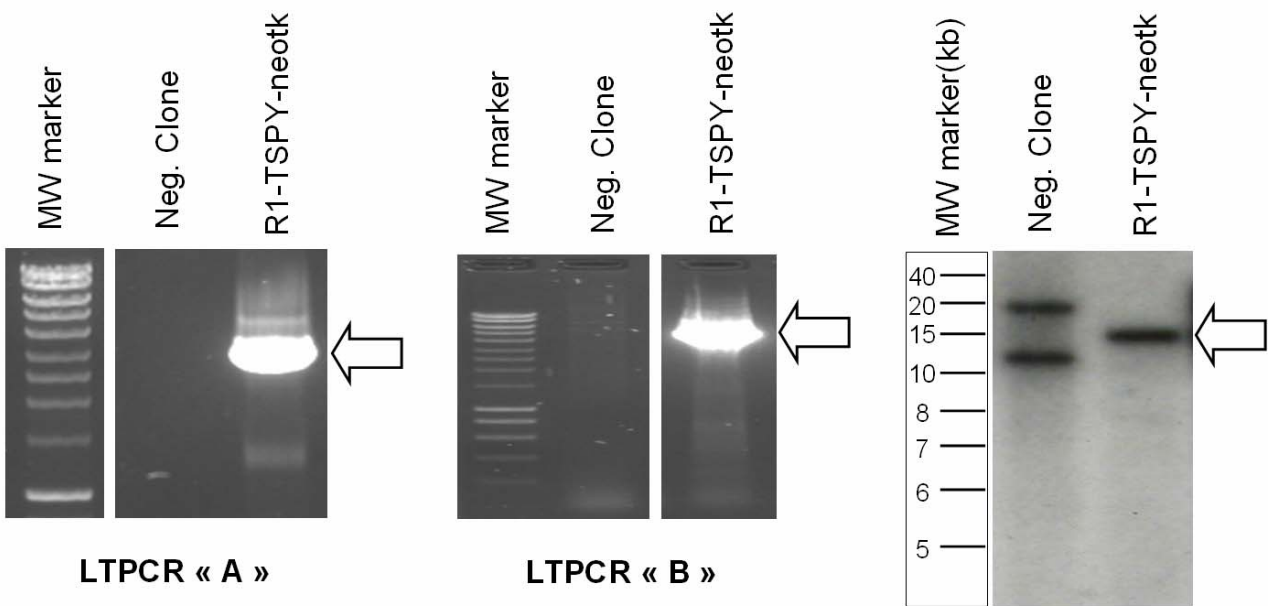

**R1-TSPY-neotk**

**Southern blot**

Supplement: pnas_102_18_6413__1.pdf [file pnas_102_18_6413__1.pdf]

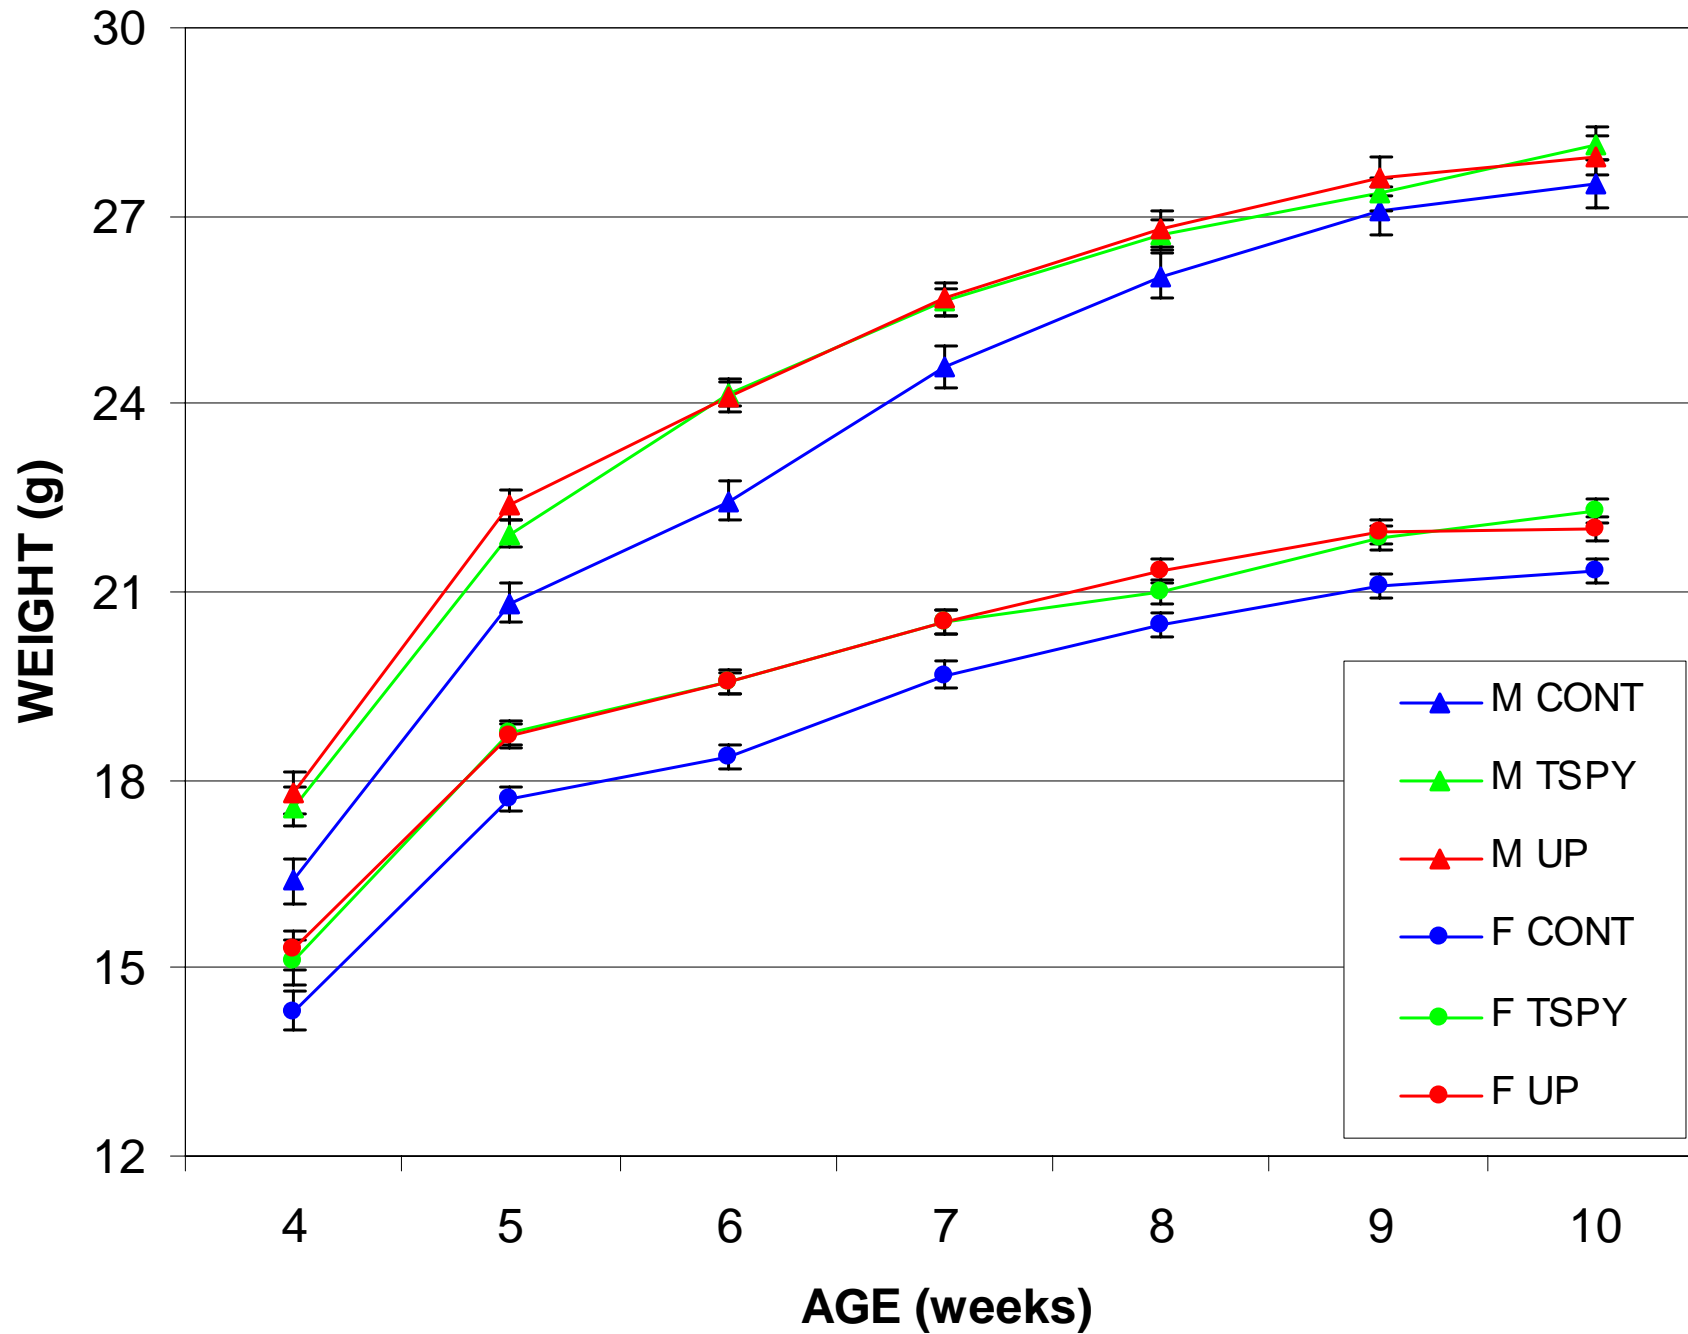

Supplement: pnas_102_18_6413__3.pdf [file pnas_102_18_6413__3.pdf]
